# Supplementary material for: Lovastatin fails to improve motor performance and survival in methyl-CpG-binding protein2-null mice
Source: eLife. 2016 Nov 28;5:e22409. doi: 10.7554/eLife.22409 (PMC5132339; doi:10.7554/eLife.22409)
Supplement: Figure 1—source data 1. — The excel file contains body weight gain of individual mice from postnatal day 35 to 57 for each experimental group. DOI: http://dx.doi.org/10.7554/eLife.22409.003 [file elife-22409-fig1-data1.xlsx]

## Sheet: Body weight gain
Figure1-source data 1
					Body Weight (PND)
	Mice cohort	Genotype	Ear id	Treatment	33	34	35	36	37	38	39	40	41	42	43	44	45	46	47	48	49	50	51	52	53	54	55	56	57
	2	WT	249	A	15.8			17.3			19.3	19.3	19.5	19.5	19.7			21	21	21.6	21.4	20.9	21.2	21.5	21.4	22.4	22.3	22.3	22.1
	3	WT	253	A	*			20.1			21.3	22.1	22.1	22.1	22.9			22.6	23.4	24.2	24.2	24	25.1	24.4	24.5	24.7	24.6	24.5	24.7
	4	WT	273	A	*			*			18.4	18.4	18.4	18.5	18.5			20.1	20.3	22	21.3	20.5	20.6	21.4	22	21.7	22.3	21.8	21.3
	4	WT	275	A	*			*			19.6	19.6	19.9	19.9	20.2			21	22.1	21.6	21.9	22.1	21.5	22.6	23.1	21.7	25.1	23.6	22.1
	4	WT	280	A	*			*			20	20	20	20.1	20.1			20.9	21.7	22.1	22.1	22	21.5	22.9	23.4	21.9	22.1	22	21.9
	4	WT	285	A	13.6			15.4			16	15.7	17.3	16.5	18.3			18.6	18.9	20	21.1	19.5	19.9	20.2	20.4	19.9	20.3	19.5	20
	5	WT	312	A	*			12.4			16.3	16.3	18.2	18.5	18.7			20.8	20.4	20.5	20.9	20.5	20.5	20.5	20.5	20.5	21.1	20.3	20
	5	WT	320	A	17			18.5			19.2	20	21	20.3	20.4			21.5	21.5	21.7	21.4	22.4	22	21.75	21.5	20.5	22.1	22	22.9
	5	WT	323	A	18.1			20.2			21.1	21.3	21.8	21.4	21.8			22.2	22.7	23	22.5	22	22.4	22.65	22.9	22.6	22.7	23.1	23.6
	5	WT	326	A	17.1			19			20.2	20.1	20.4	20.1	20			20.4	20.9	21	21	21	20.5	21.1	21.7	21.7	22.4	23	21.6
	5	WT	340	A	17.9			20.2			19.5	20.2	20.5	20.9	21.5			21.3	22.3	22.1	22.1	22.1	22	22.6	23.2	21.6	23	23.2	21.8
	5	WT	342	A	16.9			18.4			18.9	19.5	19.6	19.5	19.3			20.2	20.9	21.3	20.9	20.9	21.4	21.5	21.6	21.8	22	22.8	21.9
	5	WT	343	A	16.9			18.6			19.6	20	20.2	20.3	20.2			20.9	21.4	21.7	21.3	21.7	21.7	21.9	22.1	22.4	22.4	23.2	21.9
	5	WT	351	A	16.1			17.7			18.8	18.9	19.3	19.3	19.4			20.1	20.2	20.5	20.1	20.1	20.7	20.75	20.8	21.8	21.2	21.8	21.3
	2	WT	246	B	16.3			17.6			19.5	19.5	19.7	19.7	19.9			21.3	21.3	22.1	21.7	21.5	21.45	21.4	21.3	22.5	22.2	22.2	22.4
	3	WT	254	B	*			19			20.6	21.1	21.1	21.1	21.7			22.2	22.8	23.5	23.5	23.3	24.1	23.4	23.9	24	23.85	23.7	24.1
	3	WT	262	B	*			20.4			21.7	22.1	22.1	22.1	22.5			22.5	22.9	23.3	23.3	23	24	23.1	24.1	23.9	23.65	23.4	23.7
	4	WT	274	B	*			*			19.8	19.8	19.8	20.1	20.1			21.3	21.5	22.2	22	21.8	21.5	22.5	22.3	22	22.5	21.75	21
	4	WT	279	B	*			*			18.9	18.9	19.1	19.1	19.3			21.1	21.3	21.9	21.95	22	22	22.5	22.7	22	22.2	21.85	21.5
	4	WT	286	B	19.6			21.3			22.5	22.4	22.5	23.3	23.9			23.9	24.3	24.3	23.9	24	24	24.2	24.4	24.9	24.5	25	24.6
	4	WT	290	B	19.7			20.9			21.4	21.7	22.3	22	22			23.3	23	23.7	23.8	23.3	23	22.8	22.6	23.3	23.3	24.1	24.1
	5	WT	307	B	*			17.7			17.5	17.8	18	18.2	20.4			20.3	20.6	20.9	20.9	20.9	21.2	21.6	19.2	19.7	20.2	20.7	21.3
	5	WT	310	B	*			7.9			10.1	10.1	11.4	12	13.5			14.9	14.9	15.7	15.8	15.4	15.7	15.5	15.7	15.9	16.6	15.1	16.3
	5	WT	313	B	*			14.8			16.3	16.3	17.9	18.1	18.9			20.2	20.2	20.7	21.1	21	20.6	21	21.15	21.3	22	21.8	22.4
	5	WT	324	B	16			18.3			19.9	20.1	20.6	20.4	21.2			21.4	22.4	22.5	22.2	22	22.3	22.55	22.8	23.3	22.5	22.2	23
	5	WT	327	B	15.6			16.9			17.3	18.1	18.8	17.9	18.1			22.1	19.6	19.9	18.8	19.4	18.6	19.4	20.2	20.5	20.7	20.3	20.6
	5	WT	330	B	13			15			15.9	17.5	17.8	18.1	18.2			18.3	18.8	19.4	19.6	20.1	19.3	19.35	19.4	19.8	20	19.2	20
	5	WT	331	B	14.9			17.6			18.6	18.6	18.8	18.8	19.3			19.3	20	20.4	20.1	20	20.3	20.05	19.8	20.9	19.8	19.5	20.8
	5	WT	333	B	14.4			16.6			17.3	18.1	18.7	18.4	18.7			19.8	19.2	19.9	19.3	19.3	19.8	19.9	20	20.1	19.5	20.1	20.3
	5	WT	344	B	16.2			18.1			19.4	19.9	19.9	19.9	19.5			21.2	21.3	21.5	20.8	22	22	22.15	22.3	22.9	22.9	22.2	22.7
	2	KO	247	A	10.5			11.3			14.2	14.2	14.2	14.2	14.2			12.6	13.8	13.5	13.2	12.9	12.6	11.6	11.9	11.6	11.7	11.1	11.1
	3	KO	255	A	*			10.1			10.9	10.8	10.8	10.8	10.8			10.4	10.2	10.1	10.1	10.2	11.3	10.5	11.5	11.6	11.4	11.2	10.7
	4	KO	268	A	*			*			12.4	12.4	12.4	12.1	11.8			11.8	12.3	12.4	12.3	12.2	12.1	13.3	13	11.6	12.1	12.1	12.1
	4	KO	278	A	*			*			15.3	15.3	15.3	15.8	16.3			15.9	17.1	17.7	17.5	17.3	17	18.1	18.7	16.5	17.5	17.1	16.7
	4	KO	284	A	12.6			*			14.3	13.8	14.9	14.5	14.7			12.9	13.1	11.8	11.5	10.3	10.1	10.1	10.1	9.7				died PND55
	4	KO	287	A	13.9			*			15.5	15.9	16.5	17.7	16.9			17	16.8	17.3	17	17.2	16.5	16.45	16.4	17.1	17.2	17.3	17.1
	5	KO	304	A	*			12.1			13.7	12.5	13.05	13.6	14.4			14.1	15	12.2	12.2	13.3	12.1	13.8	12.9	13.8	12.7	11.6	12.4
	5	KO	306	A	*			11.8			13.5	15.8	15.1	14.4	14.3			15.1	14.6	14.1	14.1	13.4	13.5	14.9	14	13.6	13.85	14.1	15.1
	5	KO	321	A	13.8			15.2			15.5	15.9	15.7	15.7	15.8			15.9	15.9	16.1	15.3	15	15.6	15.3	15	14.4	14.1	14.3	14.1
	5	KO	322	A	10.3			11.7			12.6	11.9	10.2	9.7	11.1			8.5	8.2	8	8.2	8.2	8.5	8.85	9.2	9	9	9.3	8.7
	5	KO	341	A	11.4			13.1			14.8	15.3	14.9	14.3	14.4			14.1	12.9	13.4	12.2	11.3	10.5	10.1	9.7	9.2	9	9.1	9.3
	5	KO	345	A	13.5			15.8			15.3	16.8	16.5	16.4	16.5			17	16.6	17	16.7	16.6	16.5	16.15	15.8	15.7	15.6	16	13.3
	5	KO	347	A	9.3			11.3			12	12.9	13.3	13.8	13.2			13.5	14.1	14.2	14.8	14.4	14.4	14.45	14.5	15	14.7	14.6	14.7
	5	KO	349	A	6.2			7.7			9	10.1	10.4	11.1	11.3			11.3	11.4	11.5	11.3	12.8	12.7	12.55	12.4	12.9	13.2	12.8	11.7
	5	KO	353	A	10			12.5			13.3	13.7	14	14	13.3			12.7	13.5	13.6	13.1	14	13.3	12.7	12.1	13	13.2	13	12.5
	2	KO	248	B	10.6			11.3			14.1	14.3	14.4	14.4	14.5			13.9	15.1	14.8	14.3	14.35	14.4	13.9	14.9	14.4	14.1	13.6	13.6
	3	KO	256	B	*			14.3			15.6	15.6	15.9	16.2	16.2			16	16.4	16.8	16.8	16.1	16.9	16.5	17	16.8	16.5	16.2	15.8
	4	KO	269	B	*			*			11	11	11	10.9	10.9			10.9	11.3	11.7	11.1	10.5	10.8	11.3	11.2	10.1	10.5	10.5	10.5
	4	KO	276	B	*			*			10.8	10.8	10.8	10.9	10.9			10.1	10.5	10.5	10.25	10	9.2	9.8	9.8	9.2	9.2	8.9	8.6
	4	KO	283	B	13.9			*			15.7	16	16.2	16	16.5			16.5	16.3	16.8	16.9	16.4	15.8	14.8	13.8	13.1	13	11.1		died PND56
	4	KO	288	B	12.1			*			14.5	14.9	15.3	14.9	15.3			14.7	14.1	14.3	14.2	12.5	11.7	11.25	10.8	10.7	11.3	10.5	10.5
	4	KO	289	B	14.1			*			16.2	15.9	16.7	16	16.3			16.5	16.6	17.3	17.4	16.8	16.9	16	15.1	15.3	15.4	14.4	14.2
	5	KO	305	B	*			8.6			10.5	10.1	10.6	11.2	12.6			12.9	12.9	13.7	13.7	11.9	11.7	11.7	11.9	12.1	11.6	11.1	11.4
	5	KO	308	B	*			12.2			13.3	14.4	14.8	15.2	15.7			15	15	15.3	15.3	15.5	15.8	16	16.3	16.1	16.35	16.6	17.1
	5	KO	325	B	*			13.1			14.1	14.5	14.9	15.6	15.4			15.3	15.3	15.3	15.5	15.8	15	14.3	13.3					died PND54
	5	KO	332	B	8.9			11			12.5	13.7	14.3	16.5	14.3			15.1	15.1	15.1	15	15.3	15	14.9	14.8	15.2	15.1	14.6	15.3
	5	KO	334	B	8			9.7			11.2	12.5	12.9	12.9	13.1			13.3	13.7	14.2	13.6	14.1	13.4	13.35	13.3	14.1	13.8	13.2	13.9
	5	KO	346	B	8.8			10.9			10.6	11.9	12.1	11.9	12.3			13.3	13.3	13.8	13.2	13.1	13.1	12.8	12.5	12.6	12.8	13.2	10.8
	5	KO	348	B	9.7			11.4			12.7	13	12.9	13.4	12.9			12.9	13.3	13.1	13.2	13.1	13.8	13.35	12.9	13.8	13.6	13.1	14.1
	5	KO	354	B	11.5			12.9			13.9	13.9	14.4	14.1	13.7			13.4	13.6	13.8	13.2	14.4	14.1	13.65	13.2	14.4	14	14.2	13.3
					* These data have not been recorded
	Treatment code
	A= Lovastatin 1,5 mg/kg SC twice weekly for 3 weeks
	B= Vehicle
