# Supplementary material for: Lovastatin fails to improve motor performance and survival in methyl-CpG-binding protein2-null mice
Source: eLife. 2016 Nov 28;5:e22409. doi: 10.7554/eLife.22409 (PMC5132339; doi:10.7554/eLife.22409)
Supplement: Figure 3—source data 1. — The source file contains latency to fall in seconds of individual mice exposed to rotarod test on PND49-50 (page 1) and PND 56–57 (page 2) for each trial. For each mice the ear tag number, treatment code (A or B corresponding to lovastatin and vehicle), genotype and cohort (cohort 2, 3, 4 and 5) is provided. DOI: http://dx.doi.org/10.7554/eLife.22409.006 [file elife-22409-fig3-data1.xlsx]

## Sheet: Rotarod PND49-50 
Figure 3-source data 1
	Mice cohort	Genotype	Ear id	Treatment		Trial 1	Trial 2	Trial 3	Trial 4	Trial 5	Trial 6	Trial 7	Trial 8
	2	WT	249	A		89	96	98	117	256	189	300	300
	3	WT	253	A		188	155	249	300	48	284	194	157
	4	WT	273	A		247	138	300	300	300	300	300	300
	4	WT	275	A		34	229	174	155	167	300	213	252
	4	WT	280	A		254	300	300	300	300	300	300	300
	4	WT	285	A		300	196	300	213	289	300	300	300
	5	WT	312	A		73	172	231	203	287	300	199	230
	5	WT	320	A		238	278	300	243	300	225	134	239
	5	WT	323	A		26	70	300	235	300	238	300	264
	5	WT	326	A		300	300	300	300	300	300	300	300
	5	WT	340	A		202	74	172	281	300	300	300	300
	5	WT	342	A		284	300	300	300	300	300	300	300
	5	WT	343	A		122	288	300	300	300	300	300	300
	5	WT	351	A		154	300	299	276	256	300	286	228
	2	WT	246	B		140	264	66	278	300	287	300	207
	3	WT	254	B		251	300	300	274	223	300	300	282
	3	WT	262	B		108	226	162	181	247	221	197	300
	4	WT	274	B		240	249	283	299	252	258	223	140
	4	WT	279	B		21	102	62	115	192	226	265	264
	4	WT	286	B		121	178	107	255	300	300	300	300
	4	WT	290	B		198	172	200	300	300	288	227	300
	5	WT	307	B		93	248	272	300	288	300	300	300
	5	WT	310	B		63	175	171	146	129	66	111	146
	5	WT	313	B		25	158	222	136	114	125	156	168
	5	WT	324	B		102	133	105	223	178	165	300	205
	5	WT	327	B		190	96	300	300	300	300	300	300
	5	WT	330	B		248	109	300	300	206	196	300	275
	5	WT	331	B		78	296	194	274	300	260	300	300
	5	WT	333	B		264	300	252	245	300	300	300	245
	5	WT	344	B		264	226	300	300	300	300	300	300
	2	KO	247	A		300	174	223	130	300	300	227	146
	3	KO	255	A		278	126	280	278	260	270	300	300
	4	KO	268	A		126	159	240	117	127	248	226	111
	4	KO	278	A		10	240	80	48	109	177	171	74
	4	KO	284	A		9	134	137	79	89	92	61	89
	4	KO	287	A		49	137	123	88	231	118	170	144
	5	KO	304	A		66	52	158	75	97	89	65	177
	5	KO	306	A		17	118	54	176	74	164	165	200
	5	KO	321	A		8	36	33	52	65	71	43	38
	5	KO	322	A		7	5	42	27	16	3	21	31
	5	KO	341	A		15	31	22	51	75	70	91	75
	5	KO	345	A		78	155	158	254	188	232	243	210
	5	KO	347	A		12	26	23	17	46	138	161	170
	5	KO	349	A		4	111	101	67	138	168	91	163
	5	KO	353	A		10	93	112	130	139	142	227	207
	2	KO	248	B		146	300	153	264	93	116	266	244
	3	KO	256	B		129	108	176	164	230	216	237	136
	4	KO	269	B		46	135	228	183	161	202	208	201
	4	KO	276	B		162	203	148	287	231	247	26	260
	4	KO	283	B		12	55	90	42	38	51	64	76
	4	KO	288	B		33	32	233	128	220	279	227	163
	4	KO	289	B		129	123	163	210	175	82	74	159
	5	KO	305	B		73	128	43	179	214	184	268	174
	5	KO	308	B		89	161	90	101	125	93	236	231
	5	KO	325	B		6	26	21	32	30	84	34	41
	5	KO	332	B		7	24	24	94	128	36	103	71
	5	KO	334	B		16	29	60	19	80	37	58	34
	5	KO	346	B		51	11	164	170	247	205	257	233
	5	KO	348	B		95	42	162	56	163	202	42	165
	5	KO	354	B		263	218	228	210	248	247	170	151
						Trial 1	Trial 2	Trial 3	Trial 4	Trial 5	Trial 6	Trial 7	Trial 8
			WT-A	MEAN		179.357	206.857	258.786	251.643	264.5	281.143	266.143	269.286
				SD		96.989	89.5595	66.0107	60.2337	72.1705	36.234	55.96	43.5421
				SEM		25.9214	23.9358	17.6421	16.0981	19.2884	9.68394	14.9559	11.6371
				N		14	14	14	14	14	14	14	14
			WT-B	MEAN		150.375	202	206	245.375	245.562	243.25	261.188	252
				SD		86.0526	71.2517	86.2863	65.3563	64.8033	72.2436	60.7983	59.3408
				SEM		21.5132	17.8129	21.5716	16.3391	16.2008	18.0609	15.1996	14.8352
				N		16	16	16	16	16	16	16	16
			Mecp2-null-A	MEAN		65.9333	106.467	119.067	105.933	130.267	152.133	150.8	142.333
				SD		97.0497	65.6352	81.4287	77.7647	81.5768	83.2276	84.5823	73.5164
				SEM		25.0581	16.9469	21.0248	20.0788	21.063	21.4893	21.8391	18.9819
				N		15	15	15	15	15	15	15	15
			Mecp2-null-B	MEAN		83.8	106.333	132.2	142.6	158.867	152.067	151.333	155.933
				SD		72.3288	86.3884	73.0794	83.7836	74.1175	83.7901	95.5441	73.0758
				SEM		18.6752	22.3054	18.869	21.6328	19.1371	21.6345	24.6694	18.8681
				N		15	15	15	15	15	15	15	15
			Treatment code
			A= Lovastatin 1,5 mg/kg SC twice weekly for 3 weeks
			B= Vehicle

## Sheet: Rotarod PND56-57
Figure 3-source data 1
	Mice cohort	Genotype	Ear id	Treatment		Trial 1	Trial 2	Trial 3	Trial 4	Trial 5	Trial 6	Trial 7	Trial 8
	2	WT	249	A		106	64	152	247	300	224	300	203
	3	WT	253	A		300	213	300	207	300	298	290	300
	4	WT	273	A		300	300	300	300	300	300	300	300
	4	WT	275	A		77	300	300	300	167	300	300	300
	4	WT	280	A		300	300	300	300	300	300	300	300
	4	WT	285	A		300	300	300	300	300	300	300	300
	5	WT	312	A		242	75	59	140	110	300	131	264
	5	WT	320	A		160	267	95	95	212	154	73	71
	5	WT	323	A		126	114	186	122	189	276	137	230
	5	WT	326	A		300	300	300	300	300	300	300	300
	5	WT	340	A		300	216	200	300	231	165	295	291
	5	WT	342	A		300	234	300	300	300	300	300	300
	5	WT	343	A		300	300	300	300	300	300	300	300
	5	WT	351	A		300	284	39	267	300	264	289	154
	2	WT	246	B		275	242	300	248	284	300	300	243
	3	WT	254	B		266	198	254	300	300	300	166	224
	3	WT	262	B		122	188	148	138	228	228	159	187
	4	WT	274	B		184	114	155	143	175	124	165	226
	4	WT	279	B		230	231	154	256	218	238	292	179
	4	WT	286	B		300	300	150	213	300	300	300	300
	4	WT	290	B		273	300	166	300	300	300	300	300
	5	WT	307	B		300	300	265	253	300	300	125	221
	5	WT	310	B		210	170	110	51	168	252	254	269
	5	WT	313	B		77	184	211	244	81	113	60	56
	5	WT	324	B		200	227	193	125	183	287	217	209
	5	WT	327	B		300	228	300	300	222	300	300	300
	5	WT	330	B		300	172	193	300	300	285	300	237
	5	WT	331	B		300	300	300	300	300	300	300	300
	5	WT	333	B		300	300	300	300	300	300	300	300
	5	WT	344	B		300	300	300	300	300	300	300	300
	2	KO	247	A		189	197	204	273	140	89	150	170
	3	KO	255	A		277	280	300	211	138	155	258	267
	4	KO	268	A		62	62	46	32	85	46	14	28
	4	KO	278	A		199	206	200	173	213	223	197	264
	4	KO	287	A		72	96	91	21	26	23	38	36
	5	KO	304	A		20	62	65	104	88	71	64	76
	5	KO	306	A		38	48	52	28	96	61	10	5
	5	KO	321	A		95	77	87	29	42	152	84	14
	5	KO	322	A		86	48	30	2	108	148	38	37
	5	KO	341	A		32	12	23	7	43	17	5	19
	5	KO	345	A		132	9	144	199	100	142	141	170
	5	KO	347	A		50	164	33	10	158	84	178	95
	5	KO	349	A		227	61	43	81	190	224	147	140
	5	KO	353	A		279	280	275	300	211	224	81	238
	2	KO	248	B		187	199	148	79	158	190	230	145
	3	KO	256	B		209	230	164	49	217	248	251	207
	4	KO	269	B		103	110	94	133	98	30	92	87
	4	KO	276	B		111	93	150	116	53	28	19	64
	4	KO	283	B		21	39	69	115	36	21	35	43
	4	KO	288	B		44	88	111	270	62	17	57	83
	4	KO	289	B		51	129	171	242	70	77	48	96
	5	KO	305	B		17	17	19	48	123	24	3	5
	5	KO	308	B		110	219	175	189	168	164	174	166
	5	KO	332	B		58	128	67	98	90	117	55	90
	5	KO	334	B		19	38	24	27	56	60	35	6
	5	KO	346	B		236	175	103	111	198	66	95	78
	5	KO	348	B		80	97	7	27	112	70	110	136
	5	KO	354	B		68	273	190	48	193	143	158	104
						Trial 1	Trial 2	Trial 3	Trial 4	Trial 5	Trial 6	Trial 7	Trial 8
			WT-A	MEAN		243.643	233.357	223.643	248.429	257.786	270.071	258.214	258.071
				SD		85.9961	87.2949	100.576	75.7635	64.2509	51.6295	79.6436	70.6187
				SEM		22.9834	23.3305	26.88	20.2487	17.1718	13.7986	21.2856	18.8736
				N		14	14	14	14	14	14	14	14
			WT-B	MEAN		246.062	234.625	218.688	235.688	247.438	264.188	239.875	240.688
				SD		70.1574	60.2991	68.495	79.5384	67.6964	61.7254	79.798	65.631
				SEM		17.5394	15.0748	17.1237	19.8846	16.9241	15.4314	19.9495	16.4078
				N		16	16	16	16	16	16	16	16
			Mecp2-null-A	MEAN		125.571	114.429	113.786	105	117	118.5	100.357	111.357
				SD		91.5287	93.2381	94.4532	105.557	60.8213	73.0435	78.9192	96.179
				SEM		24.4621	24.9189	25.2437	28.2113	16.2552	19.5217	21.0921	25.7049
				N		14	14	14	14	14	14	14	14
			Mecp2-null-B	MEAN		93.8571	131.071	106.571	110.857	116.714	89.6429	97.2857	93.5714
				SD		71.2869	78.0931	62.1805	76.5294	60.3712	72.2768	78.2623	56.8584
				SEM		19.0522	20.8713	16.6184	20.4533	16.1349	19.3168	20.9165	15.1961
				N		14	14	14	14	14	14	14	14
			Treatment code
			A= Lovastatin 1,5 mg/kg SC twice weekly for 3 weeks
			B= Vehicle
