# Supplementary material for: Lovastatin fails to improve motor performance and survival in methyl-CpG-binding protein2-null mice
Source: eLife. 2016 Nov 28;5:e22409. doi: 10.7554/eLife.22409 (PMC5132339; doi:10.7554/eLife.22409)
Supplement: Figure 4—source data 1. — The source file contains the scores of individual mice exposed to hanging-wire test on PND50 and PND 57. For each mice the ear tag number, treatment code (A or B corresponding to lovastatin and vehicle), genotype and cohort (2, 3, 4 and 5) is provided. DOI: http://dx.doi.org/10.7554/eLife.22409.008 [file elife-22409-fig4-data1.xlsx]

## Sheet: Wire test PND50
Figure 4-source data 1
	Mice cohort	Genotype	Ear id	Group	SCORE
	2	WT	249	A	10
	3	WT	253	A	10
	4	WT	273	A	10
	4	WT	275	A	4
	4	WT	280	A	10
	4	WT	285	A	9
	5	WT	312	A	6
	5	WT	320	A	7
	5	WT	323	A	7
	5	WT	326	A	9
	5	WT	340	A	7
	5	WT	342	A	9
	5	WT	343	A	10
	5	WT	351	A	10
	2	WT	246	B	10
	3	WT	254	B	10
	3	WT	262	B	9
	4	WT	274	B	9
	4	WT	279	B	10
	4	WT	286	B	10
	4	WT	290	B	9
	5	WT	307	B	8
	5	WT	310	B	10
	5	WT	313	B	9
	5	WT	324	B	8
	5	WT	327	B	10
	5	WT	330	B	10
	5	WT	331	B	8
	5	WT	333	B	10
	5	WT	344	B	10
	2	KO	247	A	2
	3	KO	255	A	5
	4	KO	268	A	0
	4	KO	278	A	4
	4	KO	284	A	4
	4	KO	287	A	1
	5	KO	304	A	7
	5	KO	306	A	6
	5	KO	321	A	8
	5	KO	322	A	7
	5	KO	341	A	4
	5	KO	345	A	3
	5	KO	347	A	7
	5	KO	349	A	8
	5	KO	353	A	6
	2	KO	248	B	3
	3	KO	256	B	9
	4	KO	269	B	8
	4	KO	276	B	5
	4	KO	283	B	7
	4	KO	288	B	8
	4	KO	289	B	9
	5	KO	305	B	8
	5	KO	308	B	8
	5	KO	325	B	9
	5	KO	332	B	2
	5	KO	334	B	9
	5	KO	346	B	6
	5	KO	348	B	5
	5	KO	354	B	9
	Treatment code
	A= Lovastatin 1,5 mg/kg SC twice weekly for 3 weeks
	B= Vehicle

## Sheet: Wire test PND57
Figure 4-source data 1
	Mice cohort	Genotype	Ear id	Group	SCORE
	2	WT	249	A	10
	3	WT	253	A	10
	4	WT	273	A	10
	4	WT	275	A	8
	4	WT	280	A	10
	4	WT	285	A	10
	5	WT	312	A	10
	5	WT	320	A	3
	5	WT	323	A	3
	5	WT	326	A	10
	5	WT	340	A	10
	5	WT	342	A	10
	5	WT	343	A	10
	5	WT	351	A	10
	2	WT	246	B	10
	3	WT	254	B	10
	3	WT	262	B	10
	4	WT	274	B	10
	4	WT	279	B	10
	4	WT	286	B	9
	4	WT	290	B	10
	5	WT	307	B	10
	5	WT	310	B	10
	5	WT	313	B	10
	5	WT	324	B	8
	5	WT	327	B	9
	5	WT	330	B	10
	5	WT	331	B	9
	5	WT	333	B	10
	5	WT	344	B	10
	2	KO	247	A	8
	3	KO	255	A	6
	4	KO	268	A	0
	4	KO	278	A	7
	4	KO	287	A	8
	5	KO	304	A	2
	5	KO	306	A	7
	5	KO	321	A	6
	5	KO	322	A	10
	5	KO	341	A	4
	5	KO	345	A	5
	5	KO	347	A	7
	5	KO	349	A	9
	5	KO	353	A	8
	2	KO	248	B	3
	3	KO	256	B	8
	4	KO	269	B	8
	4	KO	276	B	8
	4	KO	288	B	10
	4	KO	289	B	3
	5	KO	305	B	7
	5	KO	308	B	7
	5	KO	332	B	7
	5	KO	334	B	7
	5	KO	346	B	7
	5	KO	348	B	7
	5	KO	354	B	9
	Treatment code
	A= Lovastatin 1,5 mg/kg SC twice weekly for 3 weeks
	B= Vehicle
