# Supplementary material for: Lovastatin fails to improve motor performance and survival in methyl-CpG-binding protein2-null mice
Source: eLife. 2016 Nov 28;5:e22409. doi: 10.7554/eLife.22409 (PMC5132339; doi:10.7554/eLife.22409)
Supplement: Figure 5—source data 1. — The source file contains raw data and data processing for the calculation of brain mRNA expression of Cyp46a1 in individual wild type and Mecp2-null mice at PND28 and PND56. DOI: http://dx.doi.org/10.7554/eLife.22409.014 [file elife-22409-fig5-data1.xlsx]

## Sheet: Cyp46a1-PND28
	Expression of Cyp46a1 - TaqMan assay by real-time PCR AB7500
	Experiment scheme
	Ear tag	3396	3397	3398	3399	3400	3401	3426	3427	3428	3423	3424	3425	3429	3433
	GENOTYPE	WT	KO	KO	WT	WT	KO	WT	KO	KO	WT	WT	KO	KO	WT
	Post-natal day (PND)	28	28	28	28	28	28	28	28	28	28	28	28	28	28
	Cycle number above threshold (Ct) of target gene
	Ct	20.0602	19.8513	19.573	19.6201	19.4734	19.6203	19.2087	19.4114	19.7324	19.0677	19.6103	19.1525	20.1091	19.2276	Replicate#1
	Cyp46a1	19.7824	19.7488	19.59	19.6226	19.6421	19.5541	19.0612	19.5045	19.7192	18.606	19.7419	19.7498	20.1229	19.4193	Replicate#2
		19.7387	19.5745	19.4461	19.6053	19.5969	19.6121	19.2983	19.706	19.947	19.0242	19.9185	19.27	20.2087	20.0104	Replicate#3
	MEAN	19.8604	19.7249	19.5364	19.616	19.5708	19.5955	19.1894	19.5406	19.7995	18.8993	19.7569	19.3908	20.1469	19.5524
	SD	0.174377	0.139943	0.078634	0.0093504	0.087326	0.0360871	0.119722	0.150587	0.12788	0.254935	0.154647	0.316434	0.0539633	0.408029
	Cycle number above threshold (Ct) of reference gene
	Ct	17.5799	17.555	17.1727	17.195	17.3746	17.1582	17.242	17.2402	17.4144	17.1599	17.2485	17.1881	17.3573	17.0451	Replicate#1
	RpL19	17.5972	17.3649	17.2172	17.2119	17.3401	17.1613	17.2153	17.2847	17.3084	17.1	17.3238	17.2848	17.5456	17.1956	Replicate#2
		17.5731	17.4103	17.3521	17.3098	17.4647	17.1118	17.2733	17.2488	17.5502	17.1093	17.3234	17.3819	17.3087	17.2331	Replicate#3
	MEAN	17.5834	17.4434	17.2473	17.2389	17.3931	17.1438	17.2435	17.2579	17.4243	17.1231	17.2986	17.2849	17.4039	17.1579
	SD	0.0124254	0.0992784	0.093419	0.0619799	0.0643343	0.0277273	0.0290304	0.0236044	0.121206	0.0322357	0.0433595	0.0969001	0.125127	0.0994992
	Data processing and results
	ΔCt	2.4768	2.4079	2.32567	2.3812	2.08027	2.47653	1.96517	2.1535	2.30807	1.94463	2.31173	1.86757	2.70523	2.06967	Replicate#1
	ΔCt	2.199	2.3054	2.34267	2.3837	2.24897	2.41033	1.81767	2.2466	2.29487	1.48293	2.44333	2.46487	2.71903	2.26137	Replicate#2
	ΔCt	2.1553	2.1311	2.19877	2.3664	2.20377	2.46833	2.05477	2.4481	2.52267	1.90113	2.61993	1.98507	2.80483	2.85247	Replicate#3
	MEAN ΔCt	2.27703	2.28147	2.28903	2.3771	2.17767	2.45173	1.94587	2.28273	2.3752	1.77623	2.45833	2.10583	2.74303	2.3945
	SEM	0.100677	0.0807964	0.0453994	0.00539846	0.0504177	0.0208349	0.0691218	0.0869416	0.0738317	0.147187	0.0892852	0.182693	0.0311557	0.235575
		Ear tag		MEAN ΔCt		ΔΔCt	2^-ΔΔCt	ΔΔCt	2^-ΔΔCt
		WT	KO	WT	KO	KO	KO	WT	WT
		3396	3397	2.27703	2.28147	0.0805048	0.945727	0.0760714	0.948637
		3399	3398	2.3771	2.28903	0.0880714	0.94078	0.176138	0.885069
		3400	3401	2.17767	2.45173	0.250771	0.840447	-0.0232952	1.01628
		3426	3427	1.94587	2.28273	0.0817714	0.944897	-0.255095	1.19341
		3423	3428	1.77623	2.3752	0.174238	0.886235	-0.424729	1.34232
		3424	3425	2.45833	2.10583	-0.0951286	1.06816	0.257371	0.836611
		3433	3429	2.3945	2.74303	0.542071	0.686784	0.193538	0.874459
				2.20096	2.36129	0.160329	0.901861	-3.17207e-17	1.01383	MEAN
				0.0959314	0.0751385	0.0751385	0.0445133	0.0959314	0.0710169	SEM
			2^-ΔΔCt	0.901861		Cyp46a1 expression in KO mice relative to WT

## Sheet: Cyp46a1-PND56
	Expression of Cyp46a1 - TaqMan assay by real-time PCR AB7500
	Experiment scheme
	Ear tag	3288	3290	3291	3301	3302	3305	3306	3309	3310	3311	3314	3319	3320	3321
	GENOTYPE	WT	KO	WT	KO	KO	WT	WT	WT	KO	KO	KO	WT	WT	KO
	Post-natal day (PND)	56	56	56	56	56	56	56	56	56	56	56	56	56	56
	Cycle number above threshold (Ct) of target gene
	Ct	23.1667	21.6761	22.4446	22.4975	22.6375	23.0647	22.4118	22.6763	23.0745	22.6129	23.4534	22.3915	22.878	23.667	Replicate#1
	Cyp46a1	23.3052	21.6228	22.634	22.3257	22.565	23.1688	22.4075	22.921	23.0981	22.6523	23.6958	22.2615	23.0965	23.8643	Replicate#2
		23.2228	21.5529	22.6063	22.3238	22.5948	22.9946	22.4051	22.8172	23.0733	22.9795	23.5017	22.4171	22.9468	23.7372	Replicate#3
	MEAN	23.2316	21.6173	22.5616	22.3823	22.5991	23.076	22.4081	22.8048	23.082	22.7482	23.5503	22.3567	22.9738	23.7562
	SD	0.0696649	0.0617861	0.102296	0.0997418	0.0364408	0.0876513	0.0033946	0.122818	0.0139848	0.201249	0.1283	0.0834333	0.111718	0.100008
	Cycle number above threshold (Ct) of reference gene
	Ct	18.2243	17.2167	17.4956	17.4781	17.6332	17.9282	17.6467	17.9499	17.9255	17.6869	18.106	18.8137	17.7572	18.0642	Replicate#1
	RpL19	17.5659	17.2087	17.6003	17.6271	17.6488	18.0014	17.6179	17.9995	18.0569	17.7939	18.1602	18.0789	17.8917	ND	Replicate#2
		18.2092	17.2605	17.7491	17.6193	17.8976	17.8502	17.7186	18.1075	18.1002	17.7663	18.2834	18.112	17.838	18.2187	Replicate#3
	MEAN	17.9998	17.2286	17.615	17.5748	17.7265	17.9266	17.6611	18.019	18.0275	17.749	18.1832	18.3349	17.829	18.1414
	SD	0.375844	0.0278857	0.127388	0.0838643	0.148353	0.0756127	0.0518645	0.0805832	0.090977	0.0555505	0.090909	0.415012	0.0677035	0.109248
	Data processing and results
	ΔCt	5.1669	4.44747	4.8296	4.92267	4.91097	5.1381	4.75073	4.65733	5.04697	4.86387	5.2702	4.05663	5.04903	5.52555	Replicate#1
	ΔCt	5.3054	4.39417	5.019	4.75087	4.83847	5.2422	4.74643	4.90203	5.07057	4.90327	5.5126	3.92663	5.26753	5.72285	Replicate#2
	ΔCt	5.223	4.32427	4.9913	4.74897	4.86827	5.068	4.74403	4.79823	5.04577	5.23047	5.3185	4.08223	5.11783	5.59575	Replicate#3
	MEAN ΔCt	5.23177	4.38863	4.94663	4.8075	4.87257	5.14943	4.74707	4.78587	5.05443	4.9992	5.3671	4.02183	5.1448	5.61472
	SEM	0.0402211	0.0356722	0.0590605	0.0575859	0.0210391	0.0506055	0.00195988	0.0709089	0.0080741	0.116191	0.0740741	0.0481703	0.0645006	0.0577397
		Ear tag		MEAN ΔCt		ΔΔCt	2^-ΔΔCt	ΔΔCt	2^-ΔΔCt
		WT	KO	WT	KO	KO	KO	WT	WT
		3288	3290	5.23177	4.38863	-0.472424	1.38744	0.37071	0.773402
		3291	3301	4.94663	4.8075	-0.0535571	1.03782	0.0855762	0.942408
		3305	3302	5.14943	4.87257	0.0115095	0.992054	0.288376	0.818823
		3306	3310	4.74707	5.05443	0.193376	0.874557	-0.11399	1.08222
		3309	3311	4.78587	4.9992	0.138143	0.908688	-0.0751905	1.0535
		3319	3314	4.02183	5.3671	0.506043	0.704151	-0.839224	1.78909
		3320	3321	5.1448	5.61472	0.75366	0.593097	0.283743	0.821457
				4.86106	5.01488	0.153821	0.928258	6.34413e-16	1.04013	MEAN
				0.156704	0.149692	0.149692	0.0967008	0.156704	0.13277	SEM
			2^-ΔΔCt	0.928258		Cyp46a1 expression in KO mice relative to WT
