# Supplementary material for: Lovastatin fails to improve motor performance and survival in methyl-CpG-binding protein2-null mice
Source: eLife journal article supplement (doi:10.7554/elife.22409), 2016-11-28
Supplement: supp [file elife_poa_e22409_Table_2_source_data_1.xlsx]

## Sheet: Brain 24S-OHC
Table 2-Source data 1	Effect of Mecp2 deletion on brain levels of 24S-OHC
			24S-OHC
PND28-males		Ear tag	ng/g
	WT	488	40.1
	WT	489	39.2
	WT	496	36.7
	WT	3047	36.9
	WT	3054	37.4
	WT	3059	34.4
	KO	494	36.1
	KO	495	35.1
	KO	3046	36
	KO	3053	35.9
	KO	3056	38
	KO	3058	35.4
PND56-males			24S-OHC
		Ear tag	ng/g
	WT	421	37.3
	WT	426	41.3
	WT	438	38.1
	WT	440	36.9
	WT	441	38.6
	KO	424	34.9
	KO	425	34.4
	KO	439	36.3
	KO	472	32.6
	KO	478	34.9
			24S-OHC
PND177-females		Ear tag	ng/g
	WT	281	48.4
	WT	365	50.9
	WT	396	47.9
	WT	405	50.2
	WT	415	47.1
	HET	282	45.4
	HET	293	41.5
	HET	366	42.4
	HET	401	43.1
	HET	414	42.8
Abbreviations	KO Mecp2-null
	HET, Mecp2+/-
	24S-OHC, 24S-hydroxycholesterol
