# Supplementary material for: Lovastatin fails to improve motor performance and survival in methyl-CpG-binding protein2-null mice
Source: eLife. 2016 Nov 28;5:e22409. doi: 10.7554/eLife.22409 (PMC5132339; doi:10.7554/eLife.22409)
Supplement: Table 1—source data 1. — The source file contains the concentrations of serum (mg/dL) and brain (mg/g) cholesterol in individual wild type and Mecp2-null mice at PND 28 and PND56. DOI: http://dx.doi.org/10.7554/eLife.22409.010 [file elife-22409-table1-data1.xlsx]

## Sheet: Brain and serum cholesterol
Table 1-Source data 1
	PND 28
			Brain	Serum
	genotype	Ear tag	TC (mg/g)	TC mg/dL
	WT	488	9.34035	115.717
	WT	496	8.21005	83.0865
	WT	489	9.8113	114.551
	WT	3054	9.26185	88.2386
	WT	3059	9.02637	94.1881
	KO	494	8.68885	78.5477
	KO	495	10.8474	81.5531
	KO	3053	9.62292	82.5345
	KO	3056	7.99812	77.3824
	KO	3058	8.25714	88.7293
	PND 56
			Brain	Serum
	genotype	Ear tag	TC (mg/g)	TC mg/dL
	WT	421	12.3388	97.7
	WT	426	9.16766	92.4
	WT	438	11.6637	103.8
	WT	441	10.4785	79.9
	WT	463	10.9416	80.1
	KO	424	10.3372	65.7
	KO	425	11.8286	58.8
	KO	439	9.51303	87.4
	KO	462	10.7925	63.1
	KO	469	9.18336	57.7
